# Supplementary material for: Association genetics of bunch weight and its component traits in East African highland banana (Musa spp. AAA group)
Source: PubMed Central journal article supplement (PMC6820618; doi:10.1007/s00122-019-03425-x), 2019-09-16
Supplement: 122_2019_3425_MOESM2_ESM.pdf [file 122_2019_3425_MOESM2_ESM.pdf]

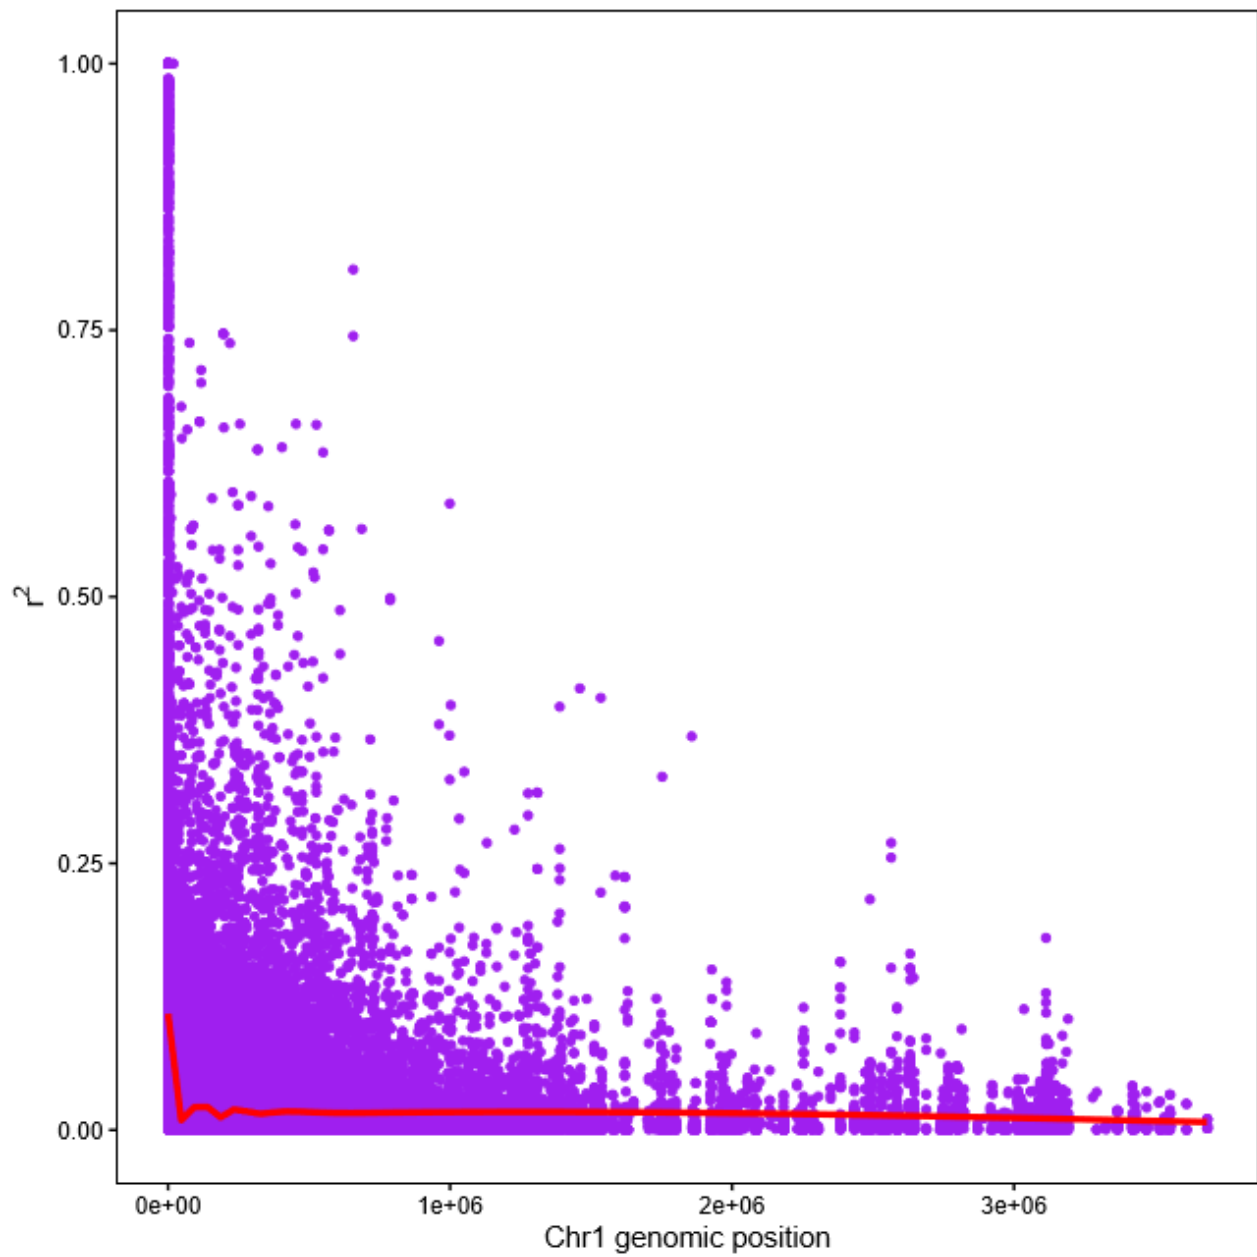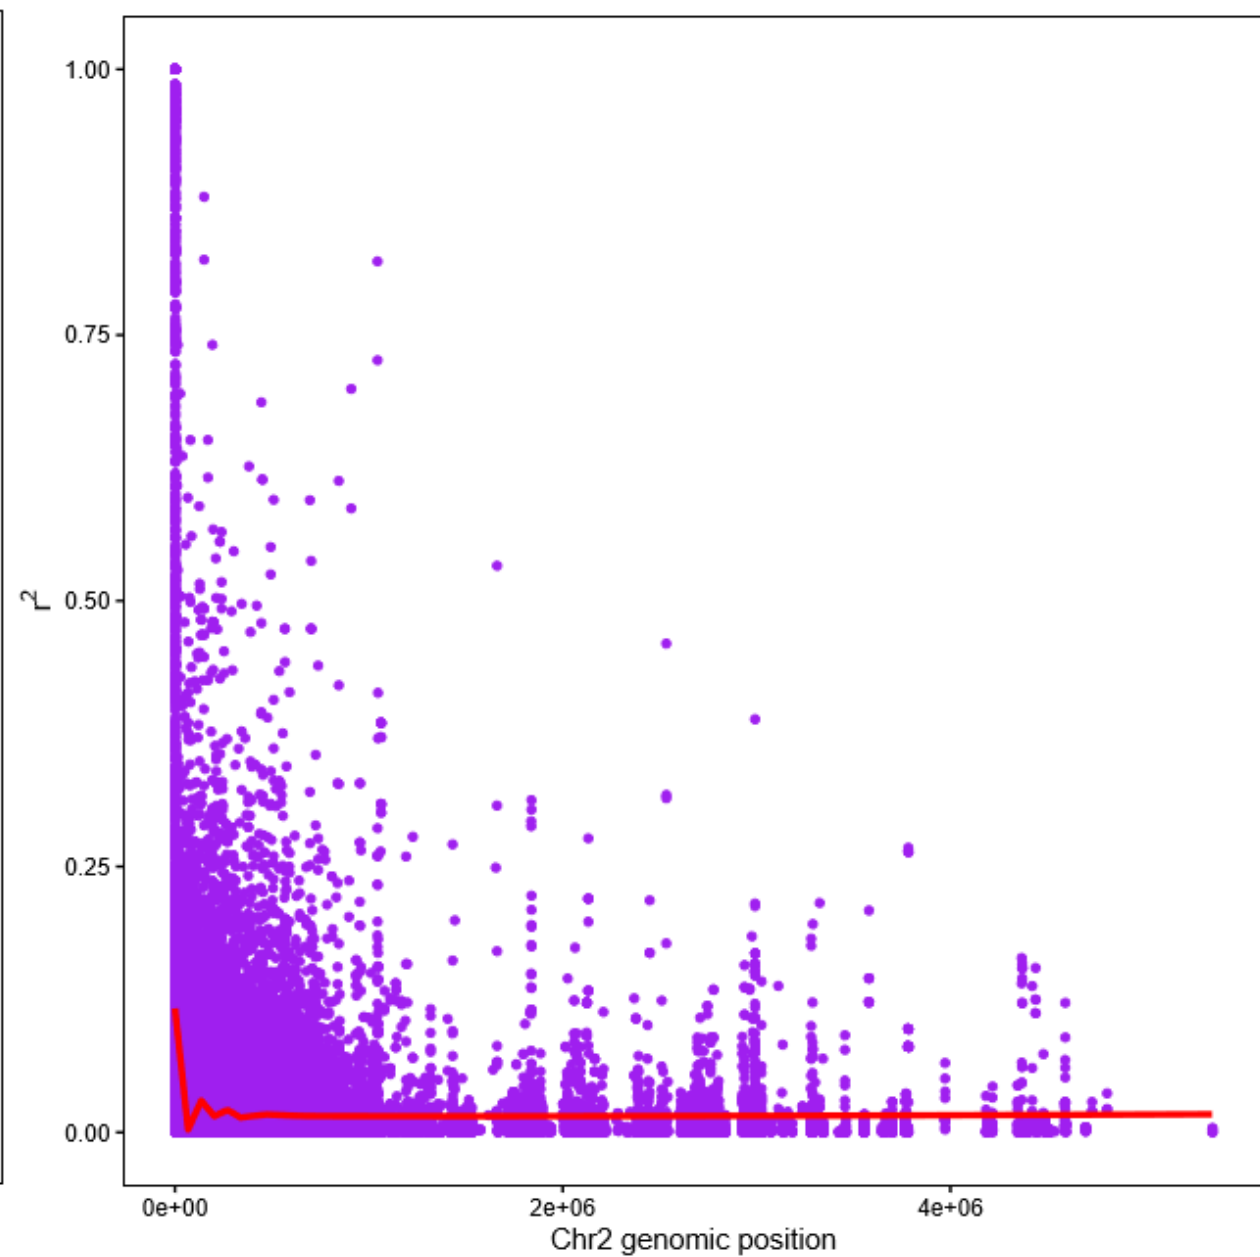

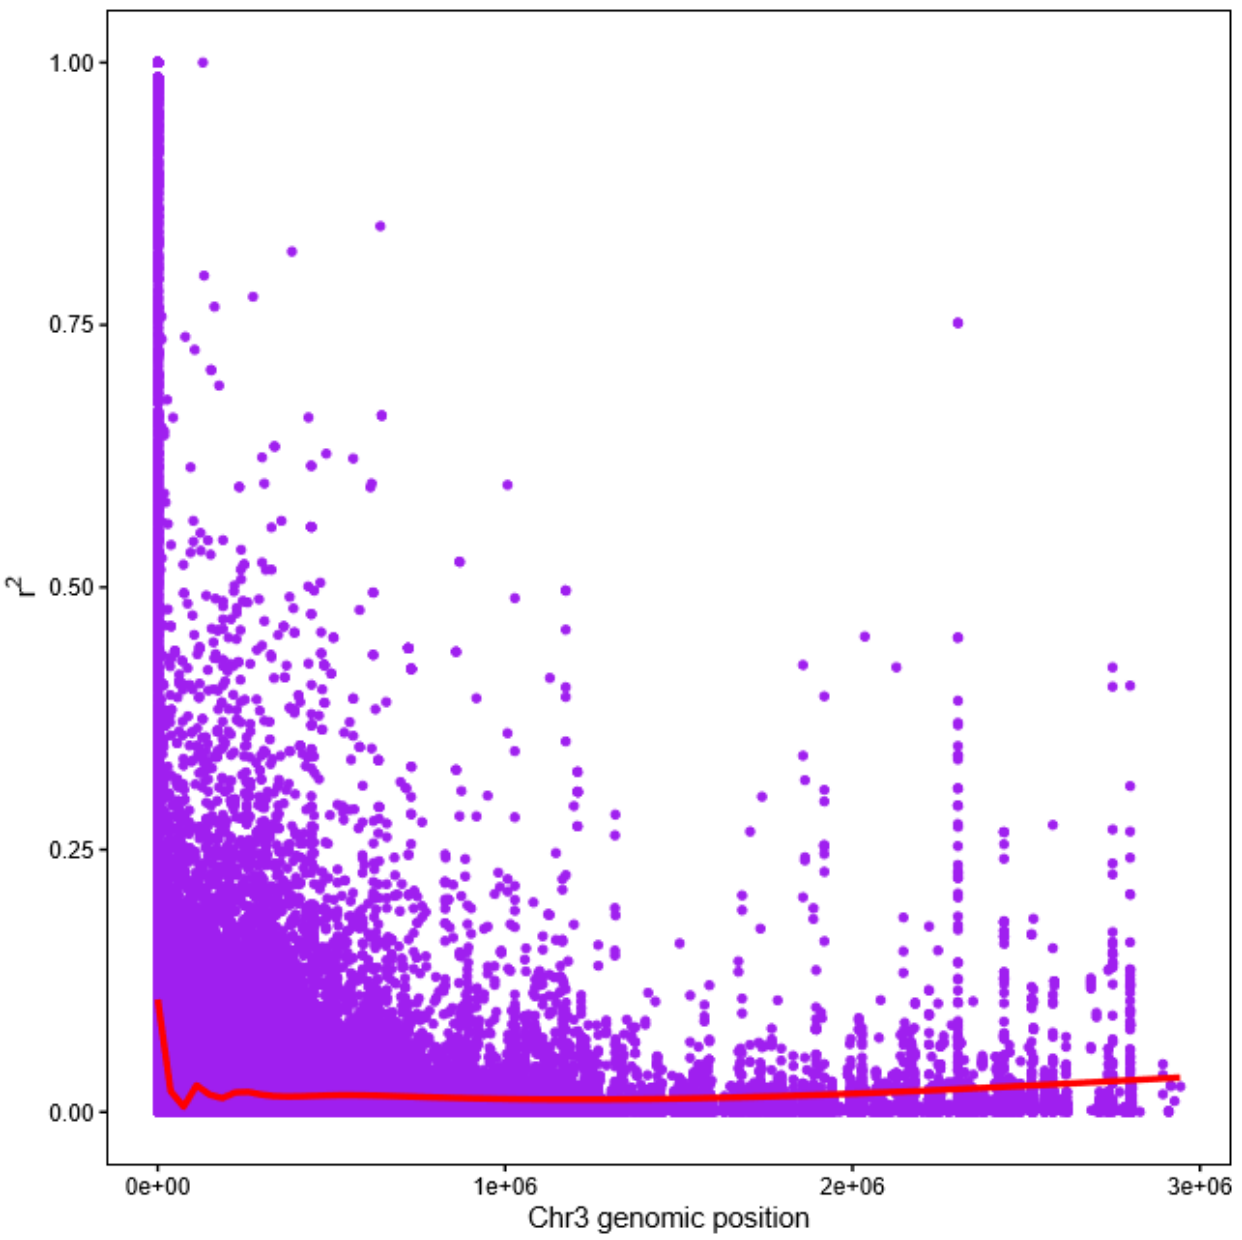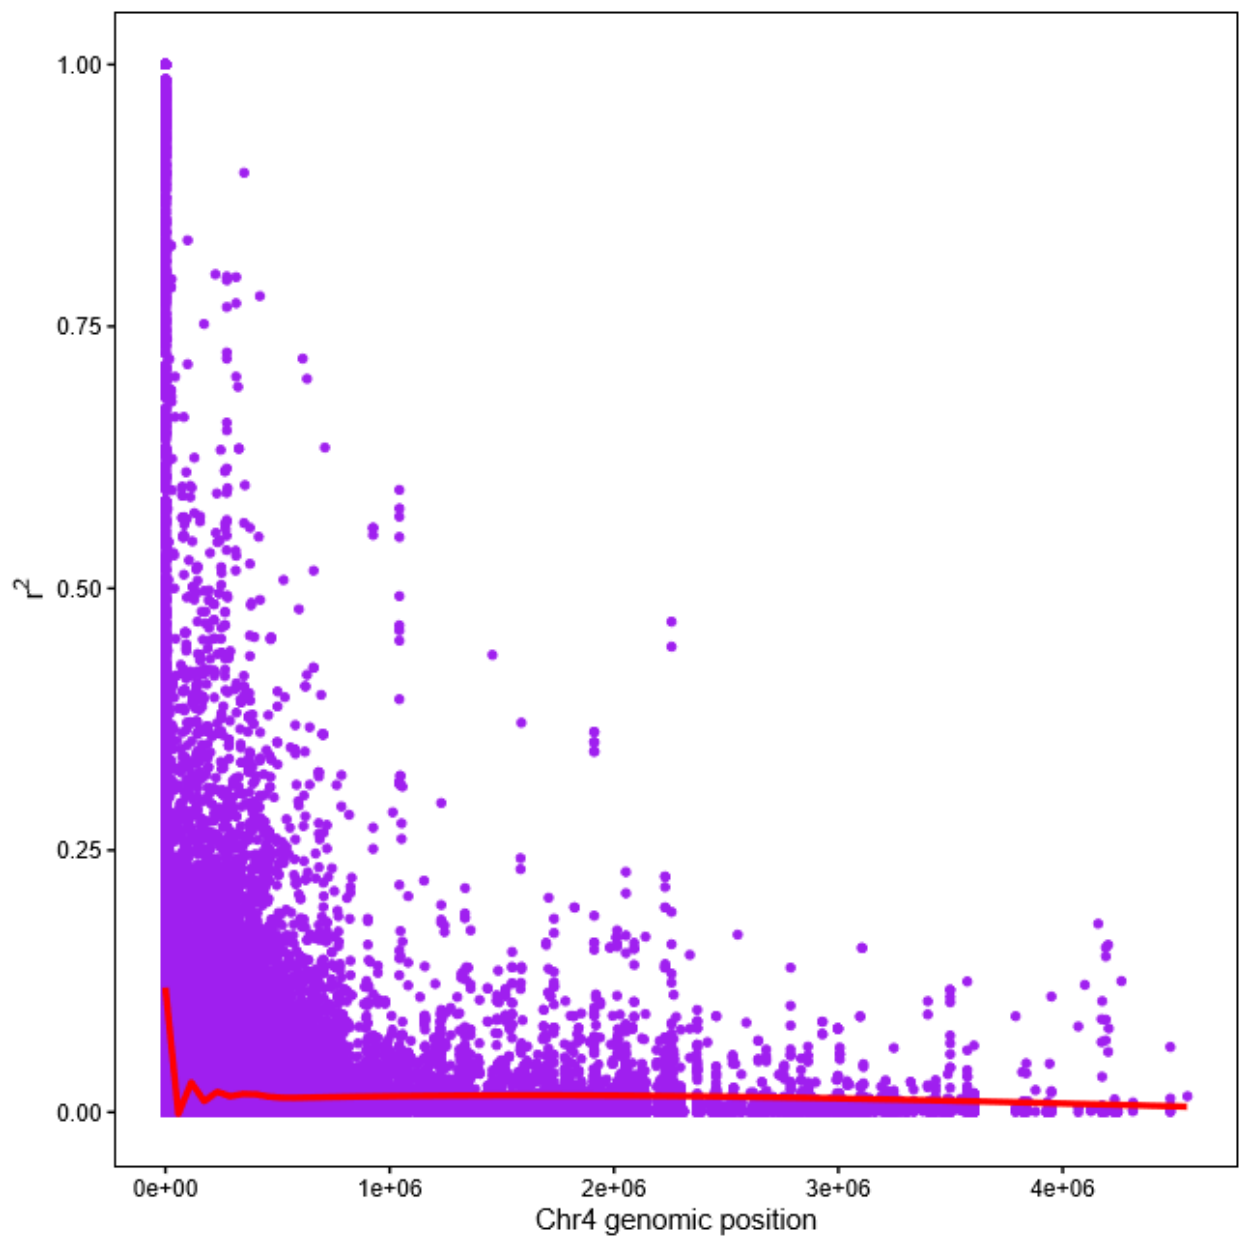

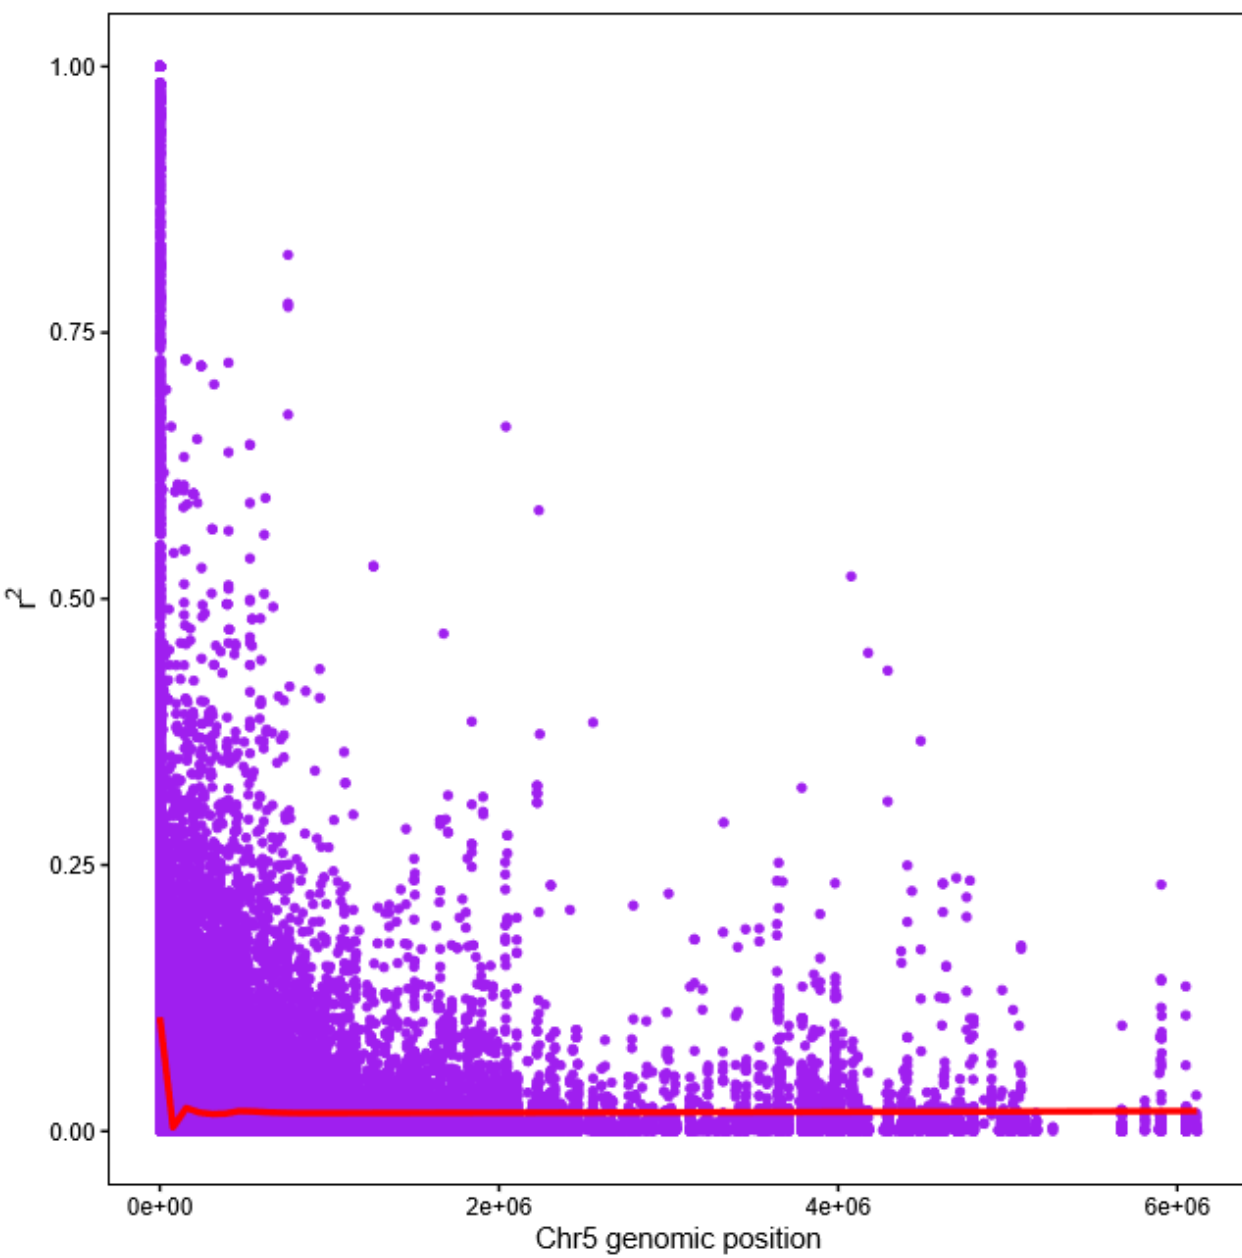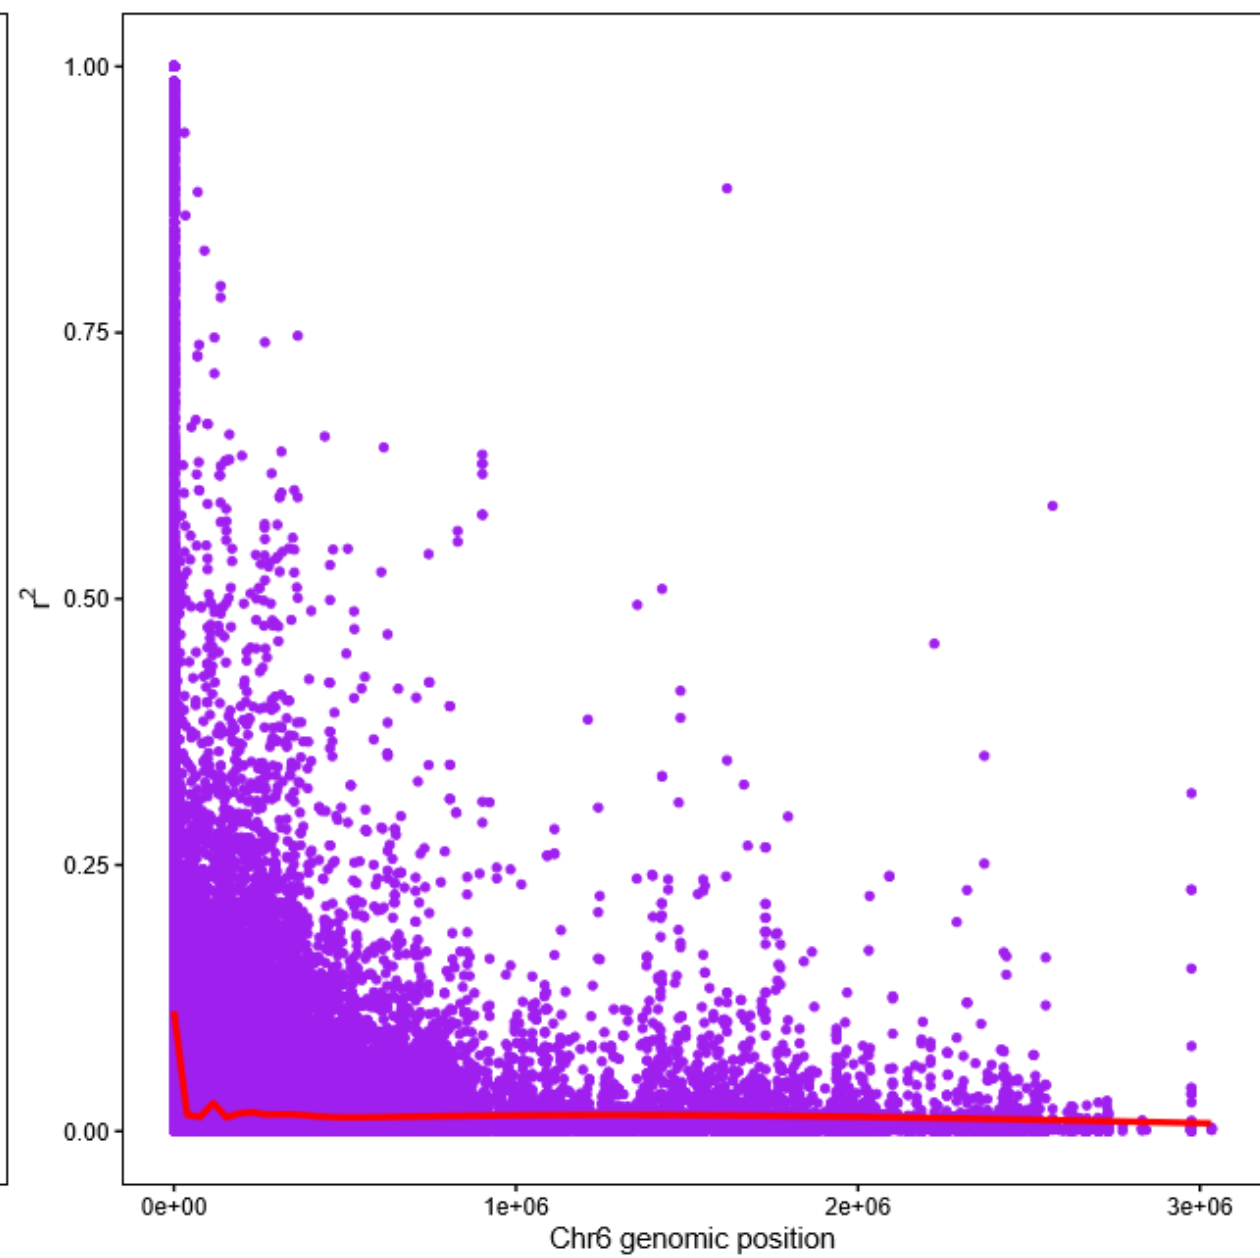

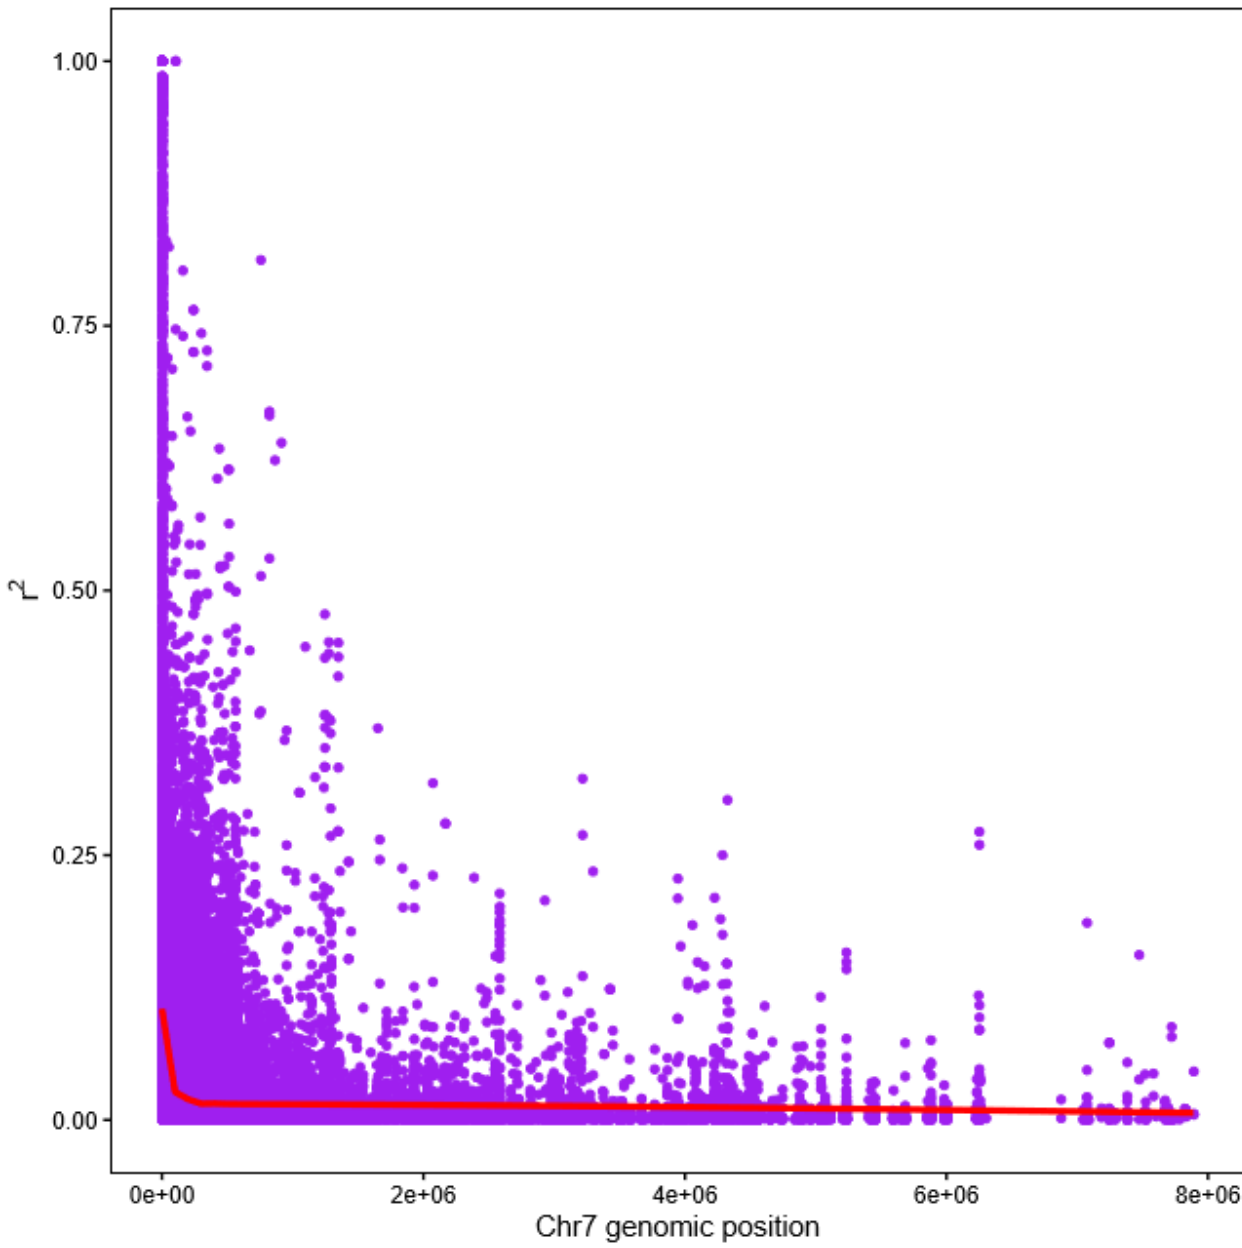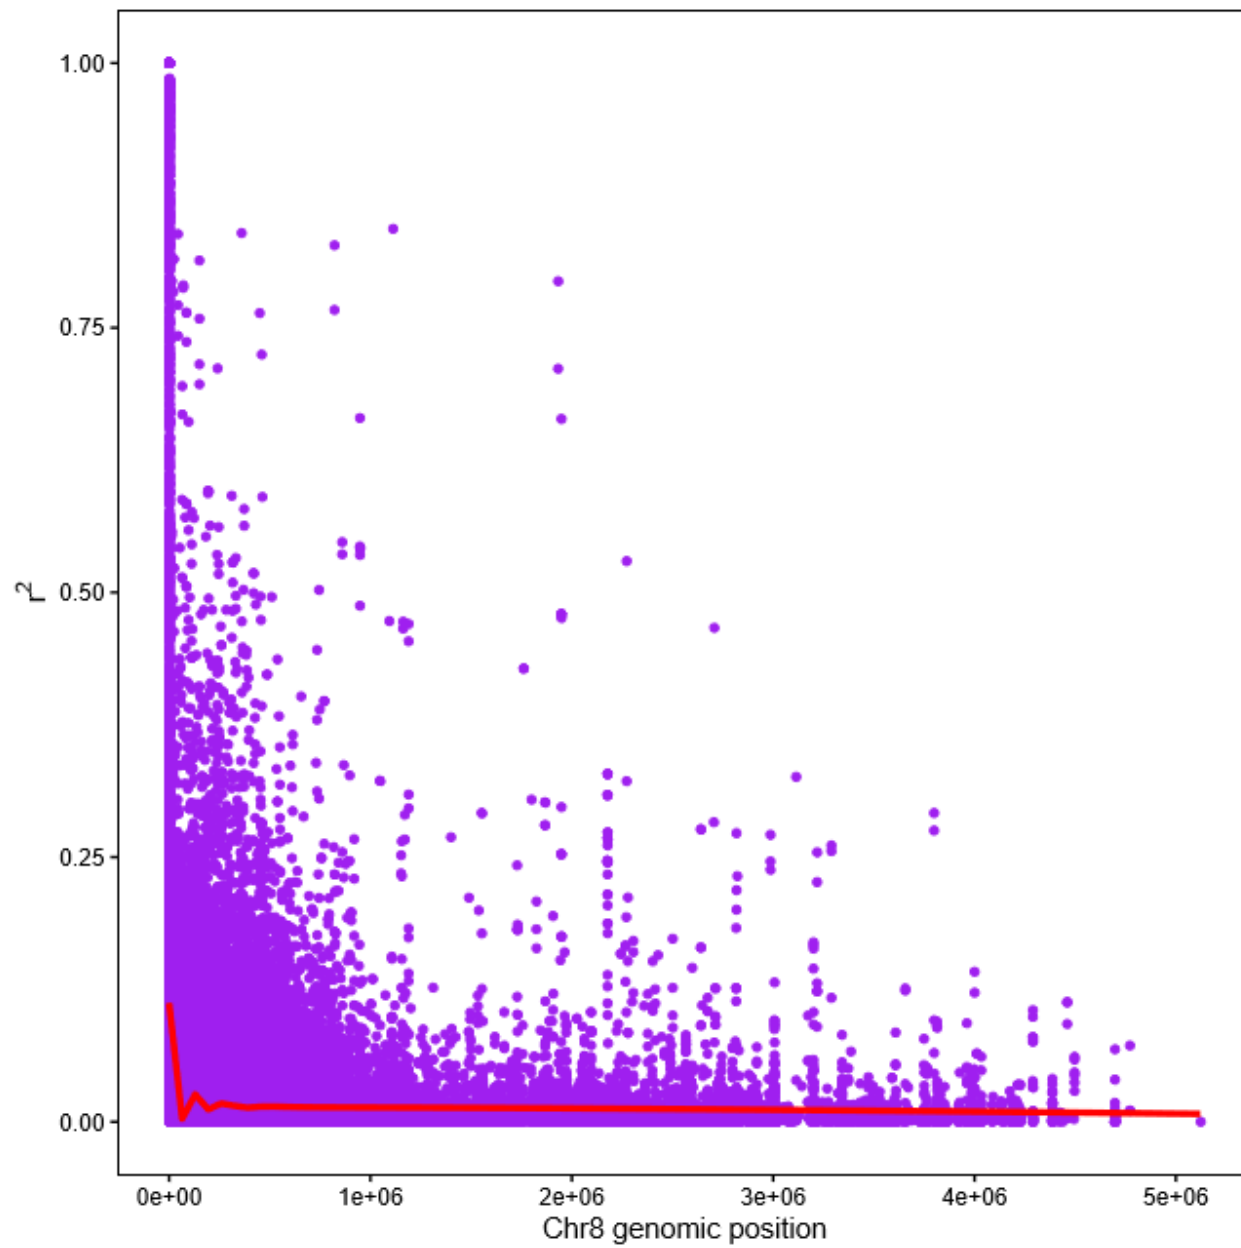

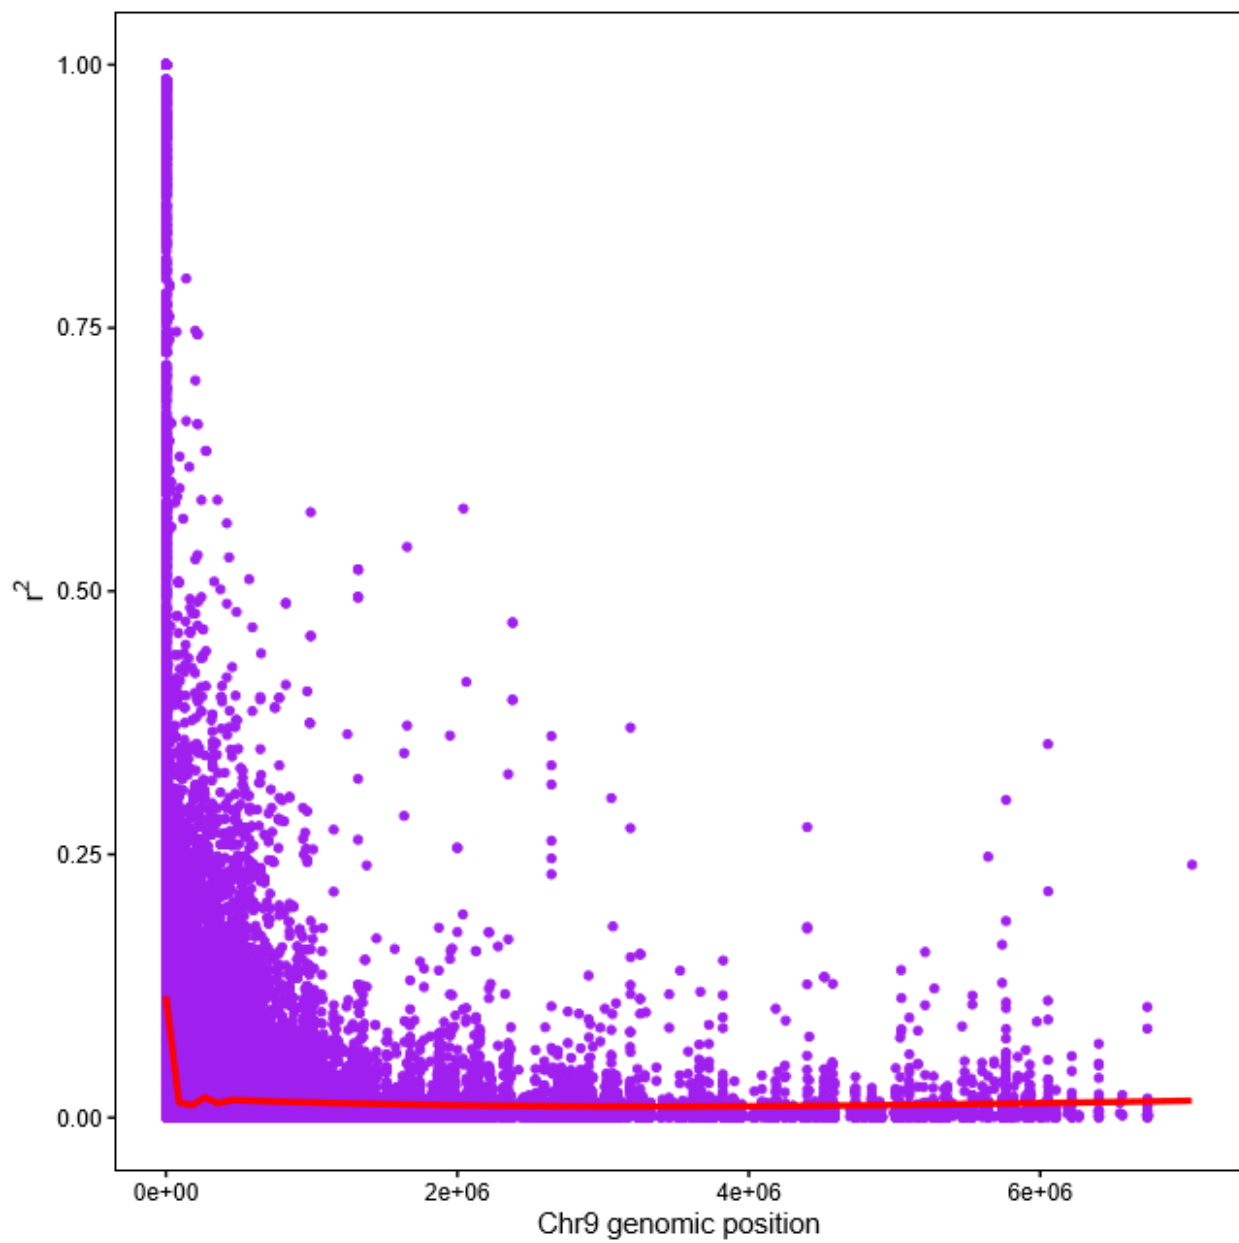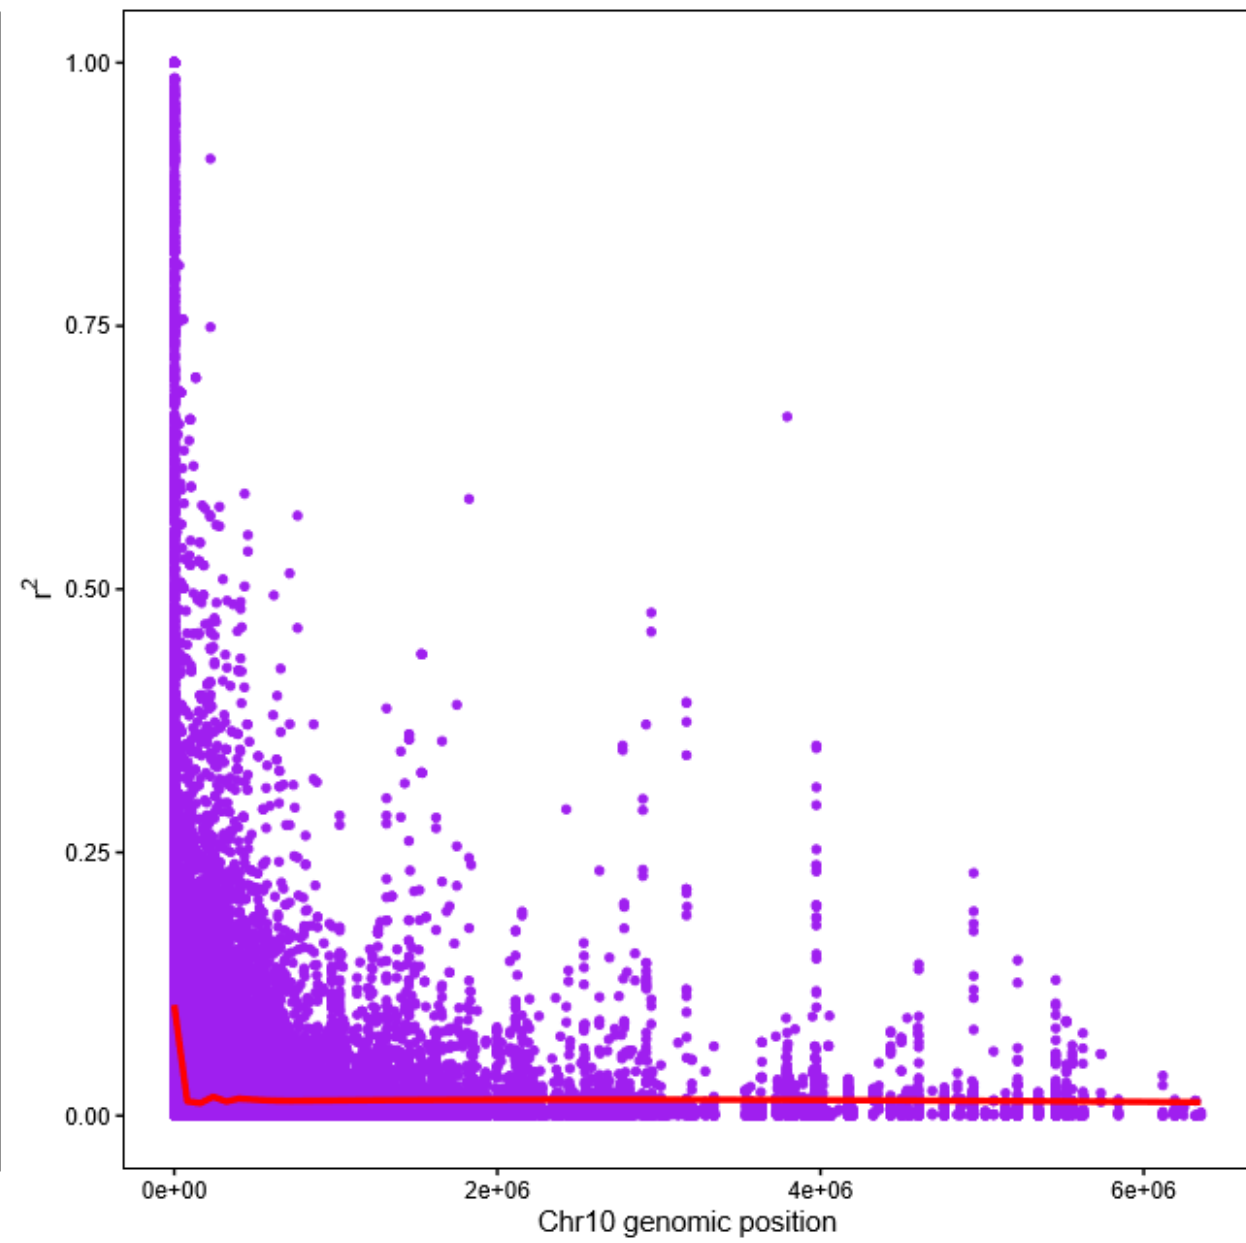

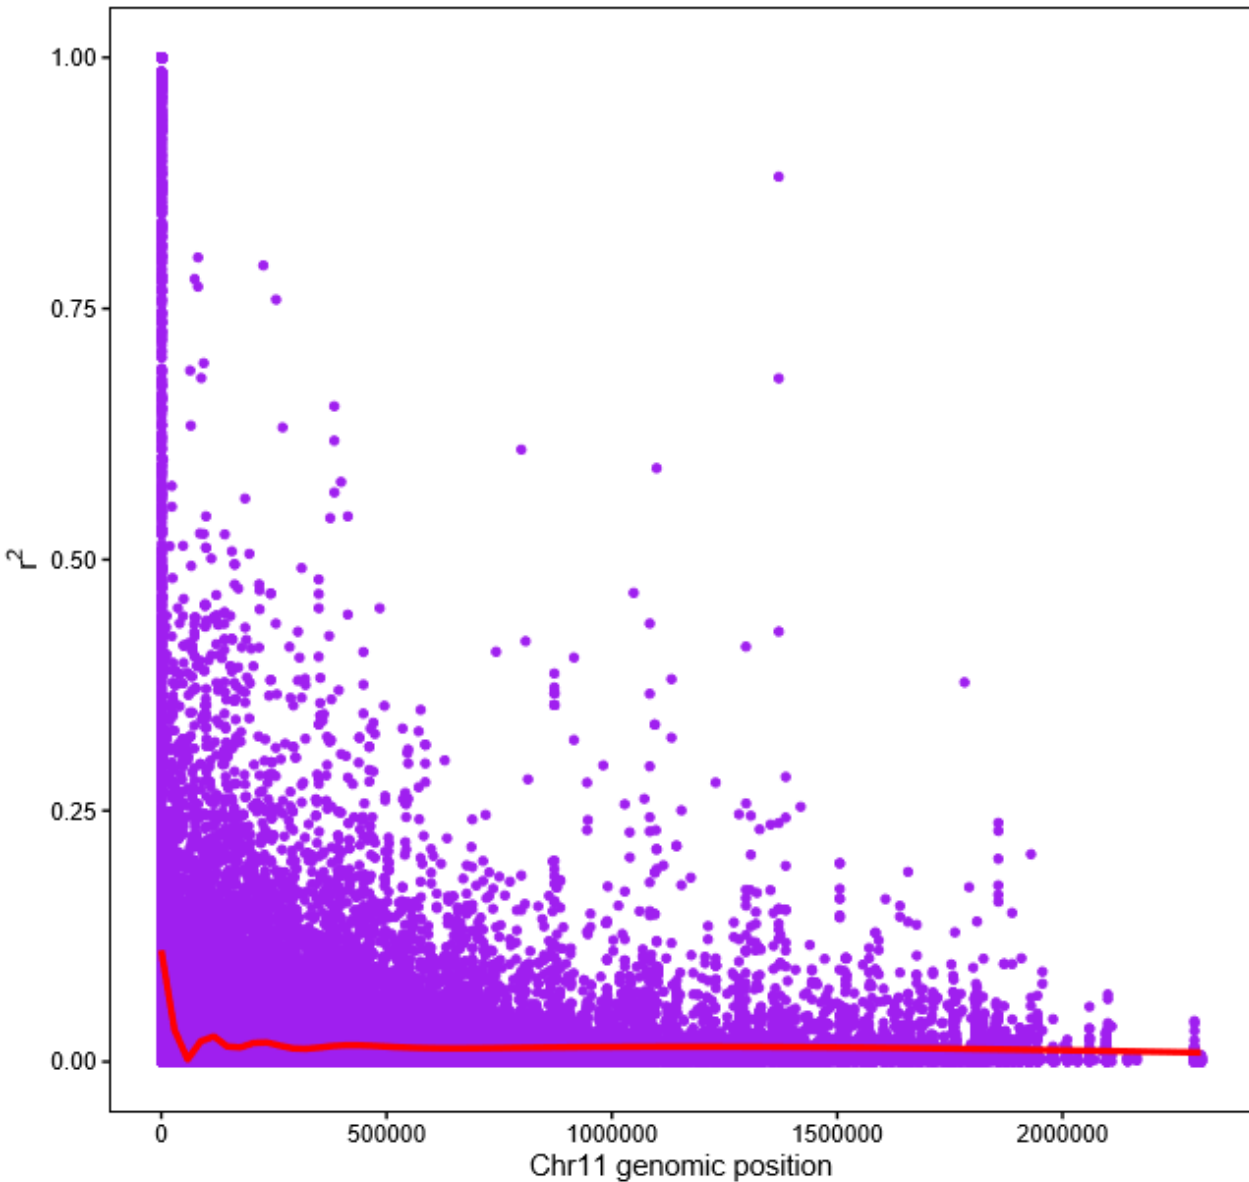

Fig S1. Linkage disequilibrium decay per chromosome. The smooth curve is based on generalized additive model (GAM) implimented by geom\_smooth in ggplot R-package
